# Supplementary material
Source: publisher figshare collection journal article supplement (https://karger.figshare.com/ndownloader/files/17708417)
Supplement: Supplementary file 1 [file 17708417]

**Figure S2. Change in fetal fraction according to change in gestational age.**


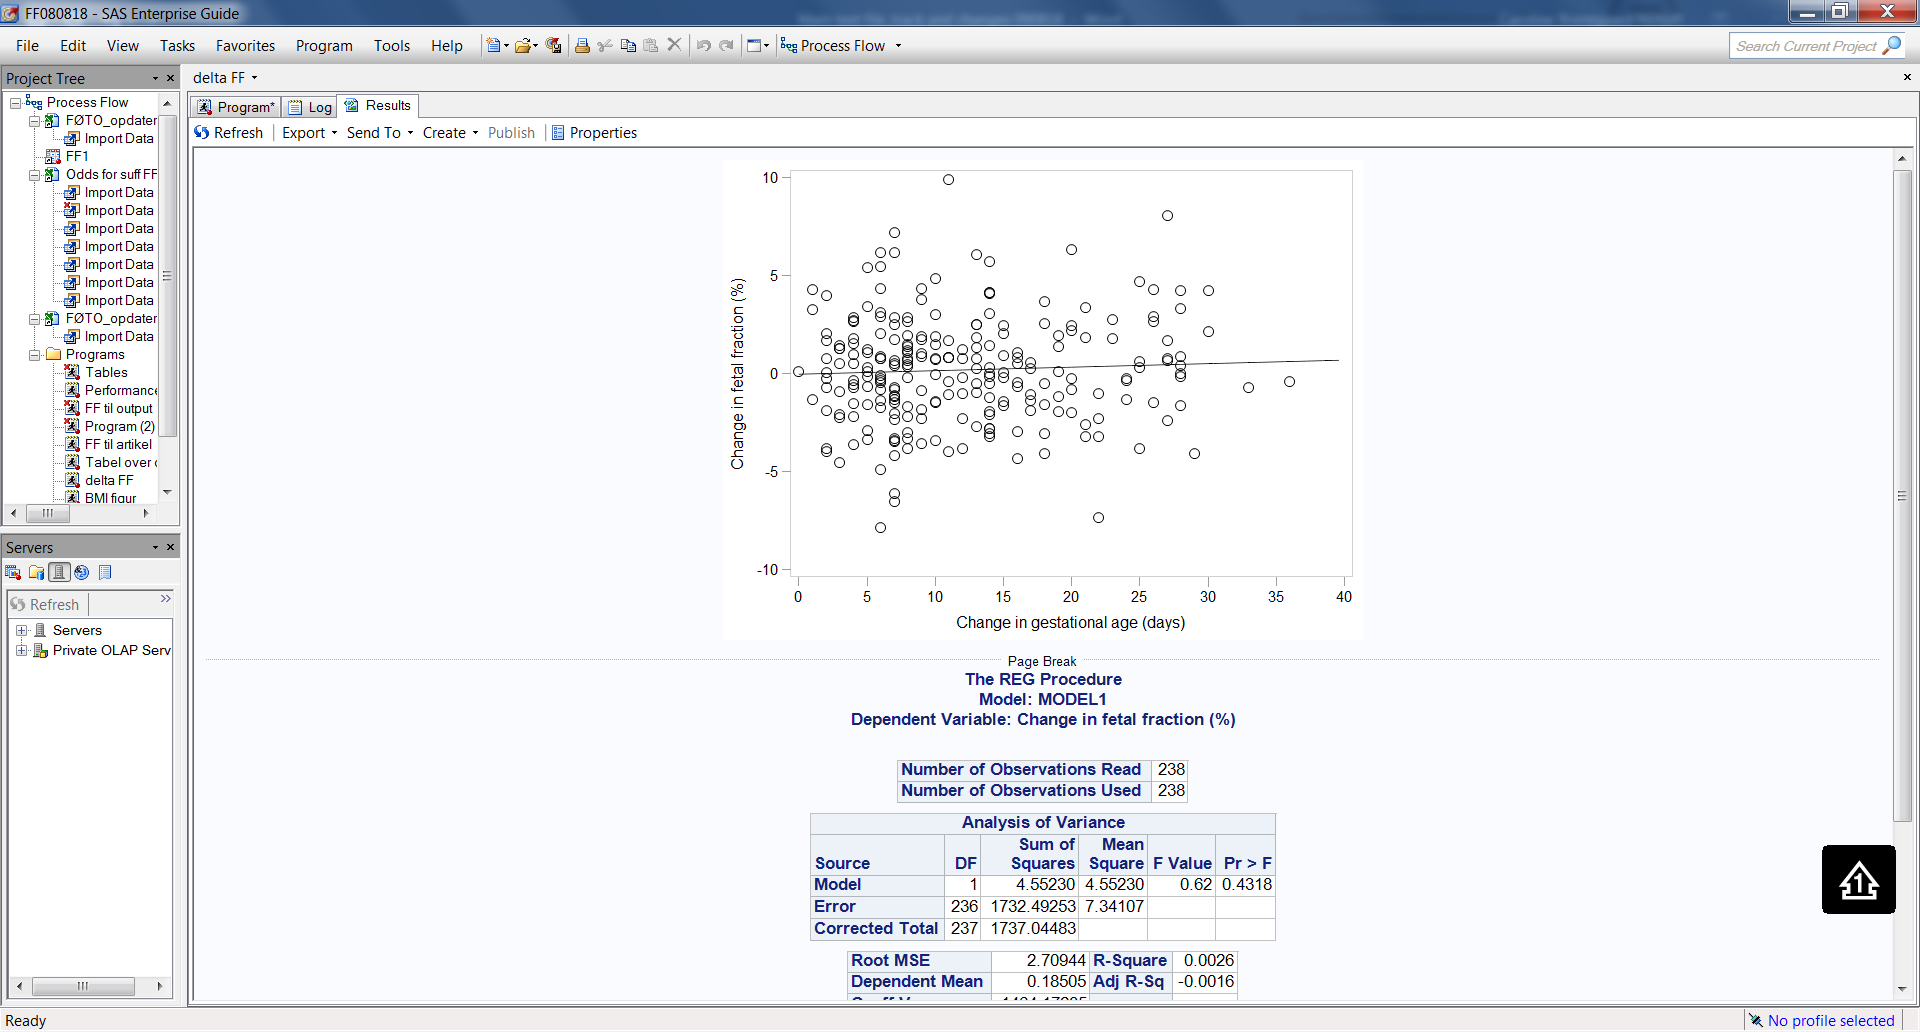


The figure includes euploid pregnancies with known outcome and two samples, with a reported fetal fraction (n=238). Regression line (black): Change in fetal fraction (%) = -0.032+0.018xChange in gestational age (days)
